# Supplementary material
Source: PubMed Central journal article supplement (PMC5422709)

A

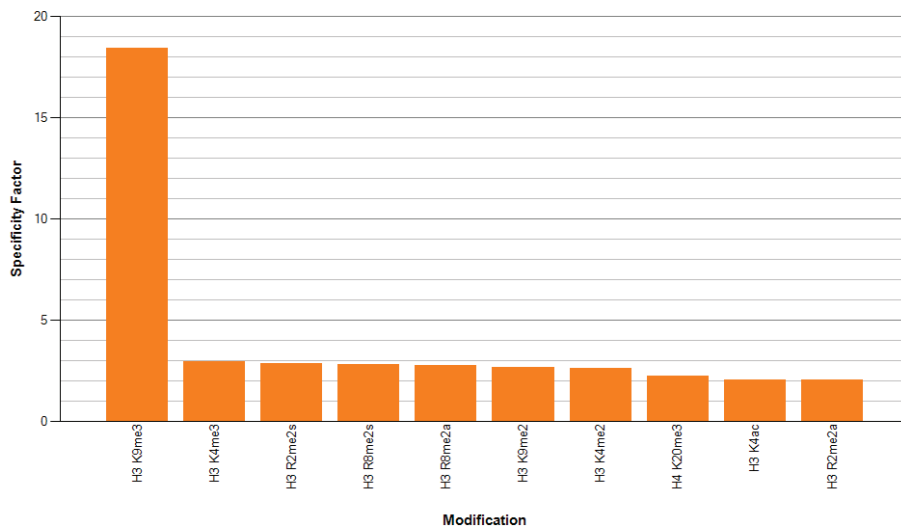

B

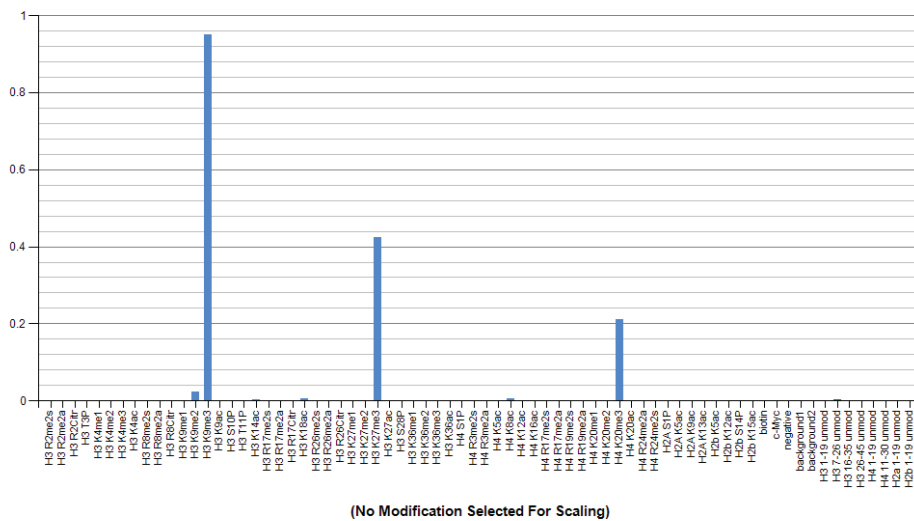

Supplement: onc2016412x2.pdf [file onc2016412x2.pdf]
