# Supplementary material
Source: PubMed Central journal article supplement (PMC5422709)

A

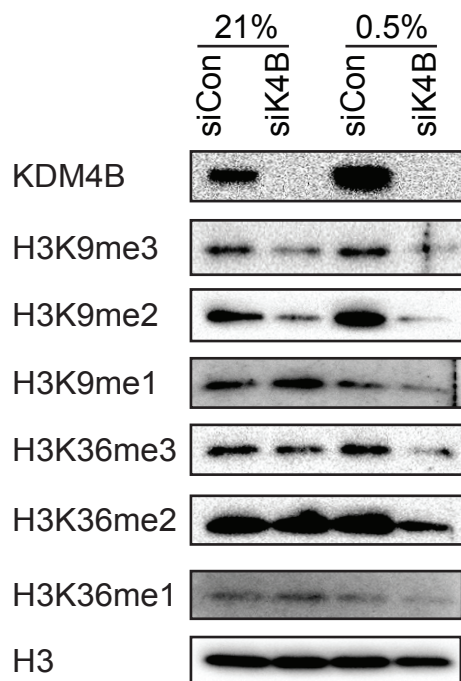

B

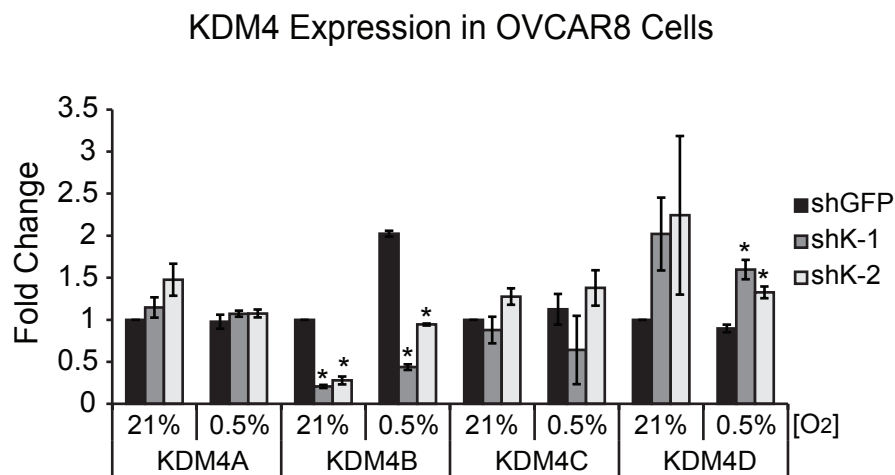

C

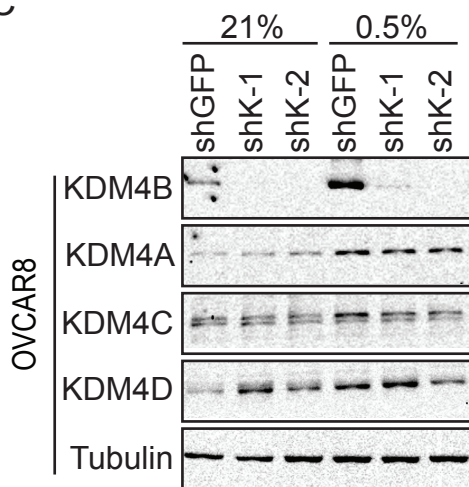

D

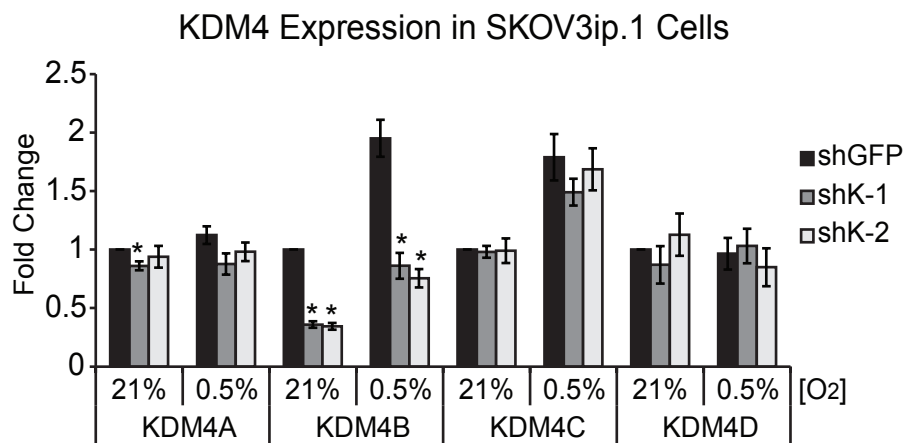

E

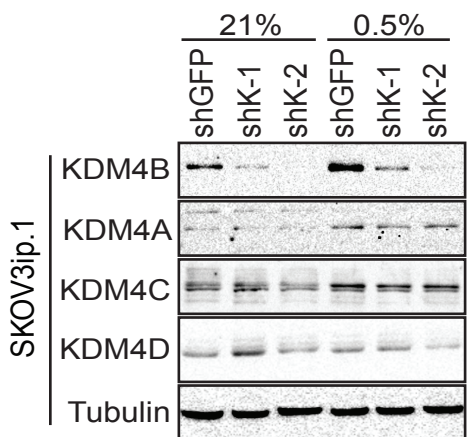

F

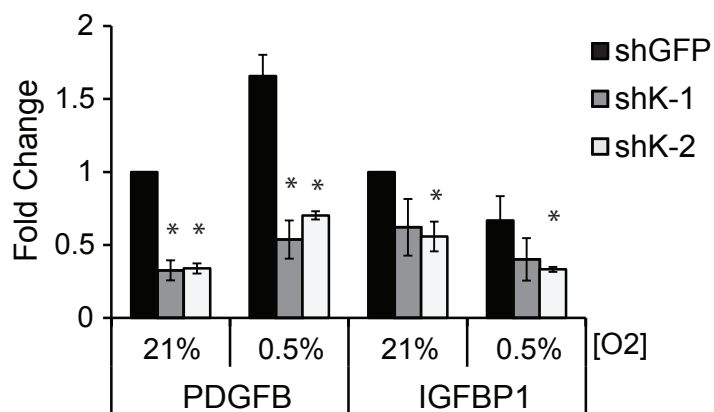

Supplement: onc2016412x3.pdf [file onc2016412x3.pdf]
