# Supplementary material
Source: PubMed Central journal article supplement (PMC5422709)

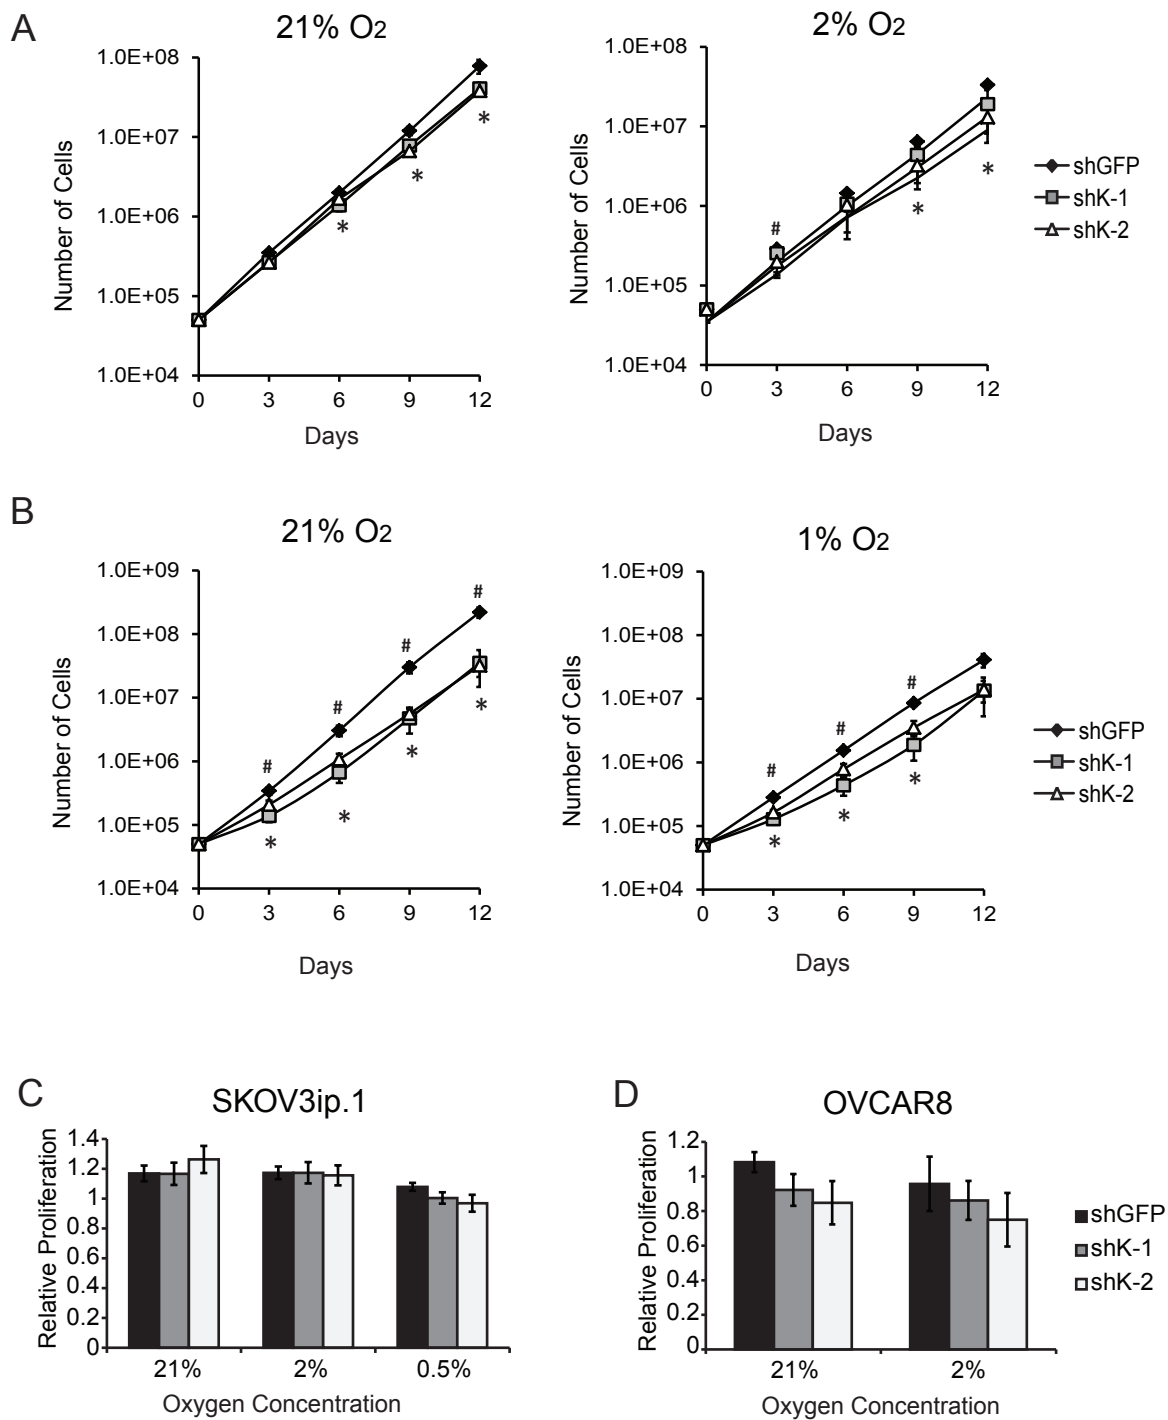

Supplement: onc2016412x4.pdf [file onc2016412x4.pdf]
